# Supplementary material for: Regulation of the polymeric immunoglobulin receptor by the classical and alternative NF-κB pathways in intestinal epithelial cells
Source: PubMed Central journal article supplement — Mucosal Immunol. 2011 Mar 30;4(4):468–78. doi: 10.1038/mi.2011.8 (PMC3125104; doi:10.1038/mi.2011.8), 2011-03-30
Supplement: mi20118x1.pdf [file mi20118x1.pdf]

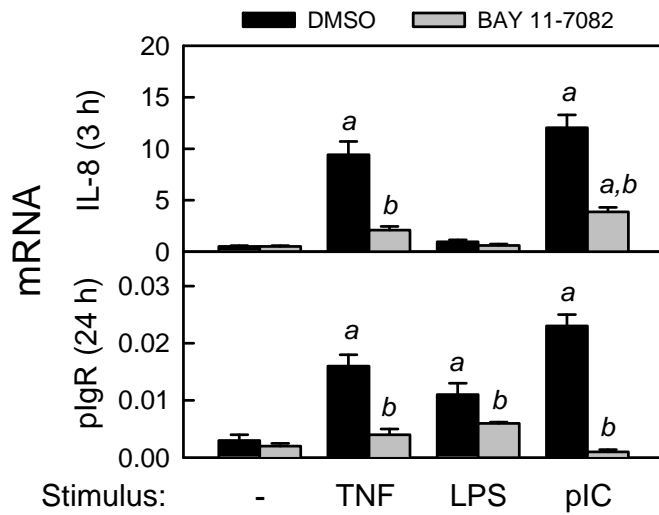

**Supplementary Figure 1** Effect of NF- $\kappa$ B inhibition on the response of the LoVo human IEC line to LPS, pIC and TNF. LoVo cells were stimulated with TNF (10 ng/ml), LPS (1  $\mu$ g/ml) or pIC (100  $\mu$ g/ml) for 3 or 24 h, in the presence or absence of 10  $\mu$ M BAY 11-7082, an inhibitor of I $\kappa$ B $\alpha$  phosphorylation. Cells cultured in the absence of BAY 11-7082 were treated with an equivalent volume of vehicle (DMSO). mRNA levels for IL-8 and pIgR were quantified by qRT-PCR and normalized to GAPDH mRNA. Data are expressed as mean  $\pm$  SEM (n = 4): *a*, the mean for stimulated cells is significantly greater than the mean for unstimulated cells ( $p < 0.05$ ); *b*, the mean for cells treated with BAY 11-7082 is significantly different from the mean for cells given the same stimulus in the absence of BAY 11-7082 ( $p < 0.05$ ).

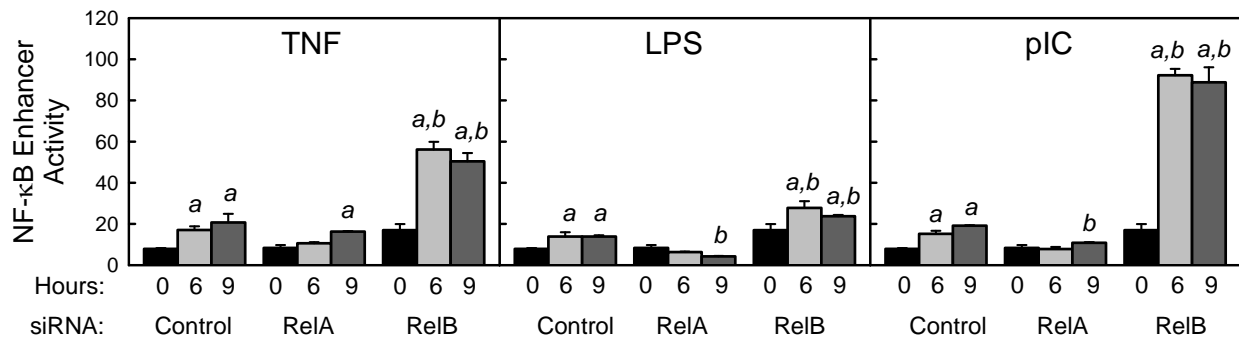

**Supplementary Figure 2** Effects of RelA and RelB knockdown on NF- $\kappa$ B enhancer activity in the HT-29 human intestinal epithelial cell-line. HT-29 cells stably transfected with the indicated siRNA plasmids were transiently transfected with an NF- $\kappa$ B regulated firefly luciferase reporter plasmid (pNF- $\kappa$ B-TK-luc) or an enhancerless control plasmid (pTK-luc). Twenty-four h after transfection, cells were stimulated for 6 h or 9 h with TNF (10 ng/ml), LPS (1  $\mu$ g/ml) or pIC (100  $\mu$ g/ml). Firefly luciferase activity was analyzed in cell lysates and normalized to the activity of a co-transfected Renilla luciferase plasmid. NF- $\kappa$ B enhancer activity was calculated by subtracting the average luciferase activity of cells treated with pTK-luc from the luciferase activity of cells treated with pNF- $\kappa$ B-TK-luc. Data are expressed as mean  $\pm$  SEM (n = 4): **a**, the mean for stimulated cells is significantly greater than the mean for unstimulated cells expressing the same siRNA ( $p < 0.05$ ); **b**, the mean for cells expressing RelA or RelB siRNA is significantly different from the mean for cells expressing control siRNA given the same stimulus ( $p < 0.05$ ).
